# Supplementary material for: Genome insight and description of antibiotic producing Massilia antibiotica sp. nov., isolated from oil-contaminated soil
Source: PubMed Central journal article supplement (PMC7988111; doi:10.1038/s41598-021-86232-z), 2021-03-23
Supplement: 41598_2021_86232_MOESM1_ESM.pdf [file 41598_2021_86232_MOESM1_ESM.pdf]

1 **Supplementary Materials**

2 **Scientific Reports**

3

4 **Genome insight and description of antibiotic producing *Massilia antibiotica***  
5 **sp. nov., isolated from oil-contaminated soil**

6 Ram Hari Dahal<sup>1,2</sup>, Dhiraj Kumar Chaudhary<sup>3</sup> and Jaisoo Kim<sup>2\*</sup>

7 <sup>1</sup>Department of Microbiology, School of Medicine, Kyungpook National University, Daegu  
8 41944, Republic of Korea

9 <sup>2</sup>Department of Life Science, College of Natural Sciences, Kyonggi University, Suwon,  
10 Kyonggi-Do 16227, Republic of Korea

11 <sup>3</sup>Department of Environmental Engineering, Korea University Sejong Campus, Sejong City  
12 30019, Republic of Korea

13 Running title: Genome insight and description of *Massilia antibiotica*

14 Key words: *Massilia antibiotica*, Oil-contaminated soil, Multidrug-resistant, Antibiotics,  
15 Antimicrobial-resistance

16 Contents category: New Taxa; Subsection: *Proteobacteria*

17 \*Corresponding author: Jaisoo Kim.

18 Tel: +82-31-249-9648; Fax: +82-31-253-1165; E-mail: jkimtamu@kgu.ac.kr

19

20

21

22

23

24 **Supplementary Table S1.** The genome features of strain TW-1<sup>T</sup>.

25

| <b>Genome features</b> | <b>Value</b> |
|------------------------|--------------|
| Genome size (bp)       | 7,051,197    |
| G+C content (mol%)     | 63.3         |
| No. of contigs         | 46           |
| N50                    | 309,394      |
| No. of subsystem       | 339          |
| No. of proteins        | 5,977        |
| Total genes            | 6,158        |
| CDSs (total)           | 6,066        |
| Protein-coding genes   | 5,977        |
| Genes (RNA)            | 92           |
| rRNAs (5S, 16S, 23S)   | 12 (6, 3, 3) |
| tRNAs                  | 76           |
| ncRNAs                 | 4            |
| Pseudo Genes (total)   | 89           |
| CRISPR repeats         | 6            |
| Cas cluster            | 6            |
| Genome coverage        | 89.0×        |

26

27

28

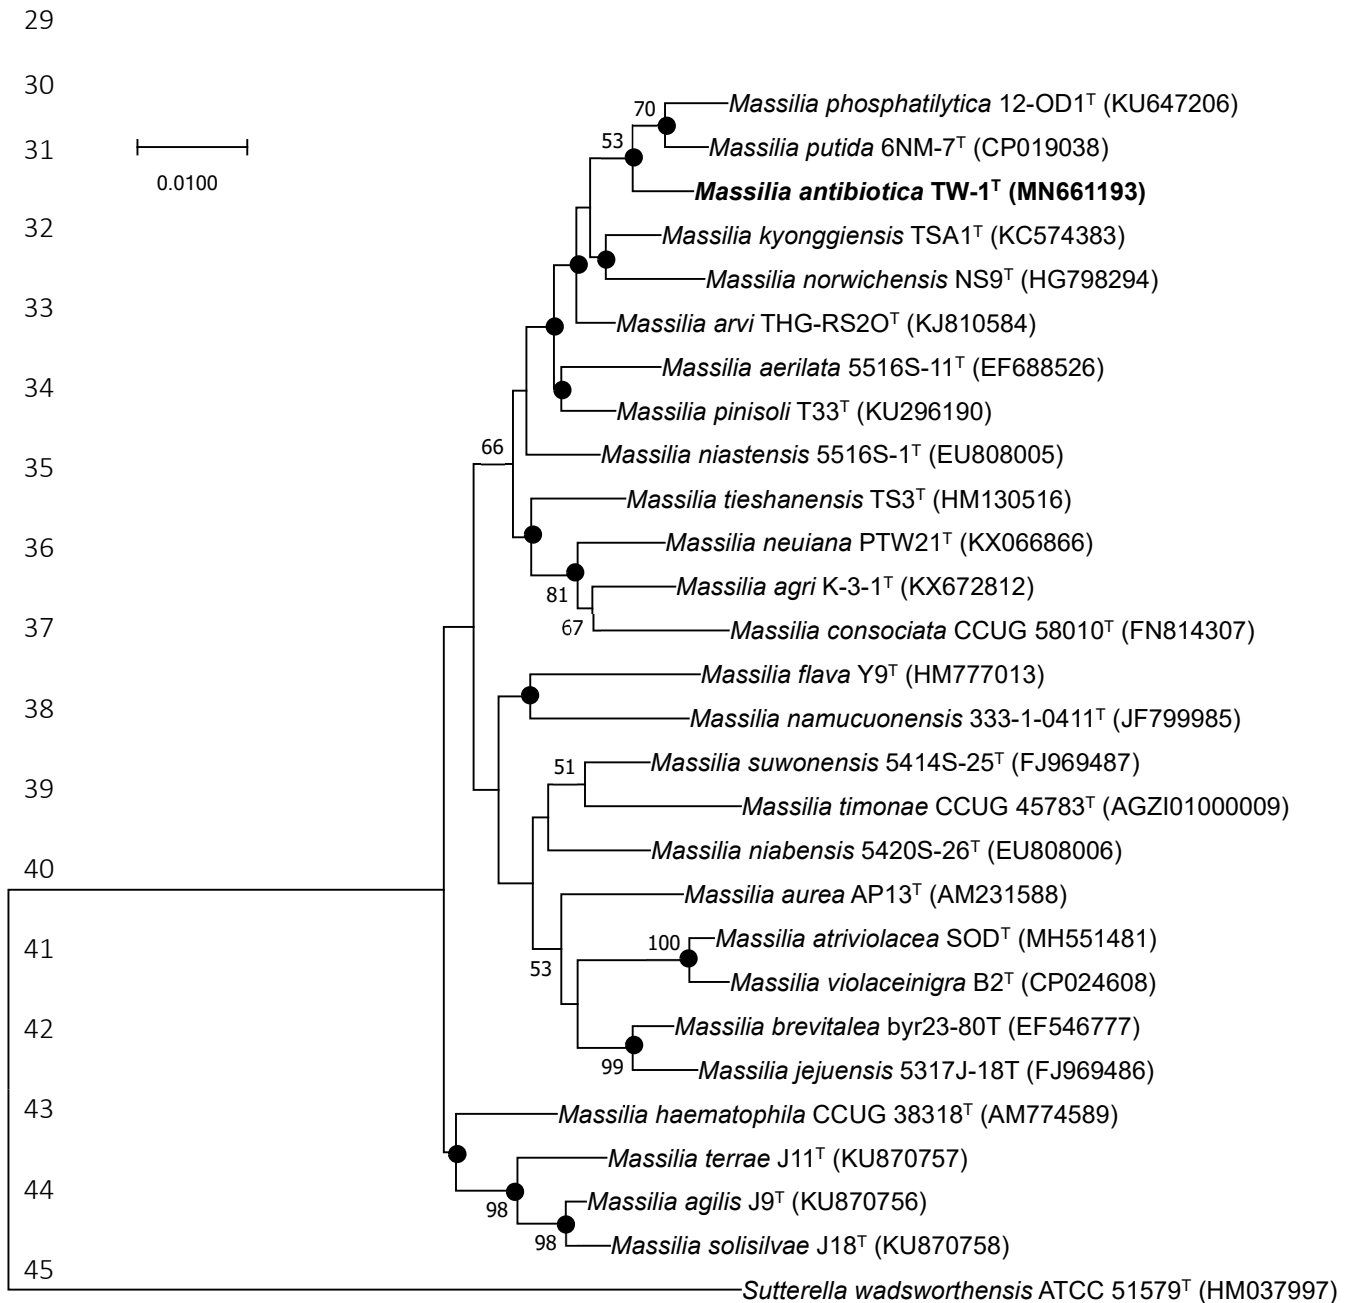

46

47 **Supplementary Figure S1** Neighbour-joining tree based on 16S rRNA gene sequences  
 48 showing the phylogenetic position of strain TW-1<sup>T</sup> among the closely related members of the  
 49 genus *Massilia*. Filled circles indicate nodes recovered by treeing methods (neighbour-joining  
 50 and maximum-likelihood). The numbers at the nodes indicate the percentage of 1000 bootstrap  
 51 replicates yielding this topology; only values >50% are shown. *Sutterella wadsworthensis*  
 52 ATCC 51579<sup>T</sup> was used as an out-group. GenBank accession numbers are given in parentheses.  
 53 Bar, 0.010 substitutions per nucleotide position.

54

55

56

57

58

59

60

61

62

63

64

65

66

67

68

69

70

71

72

73

74

75

76

77

78

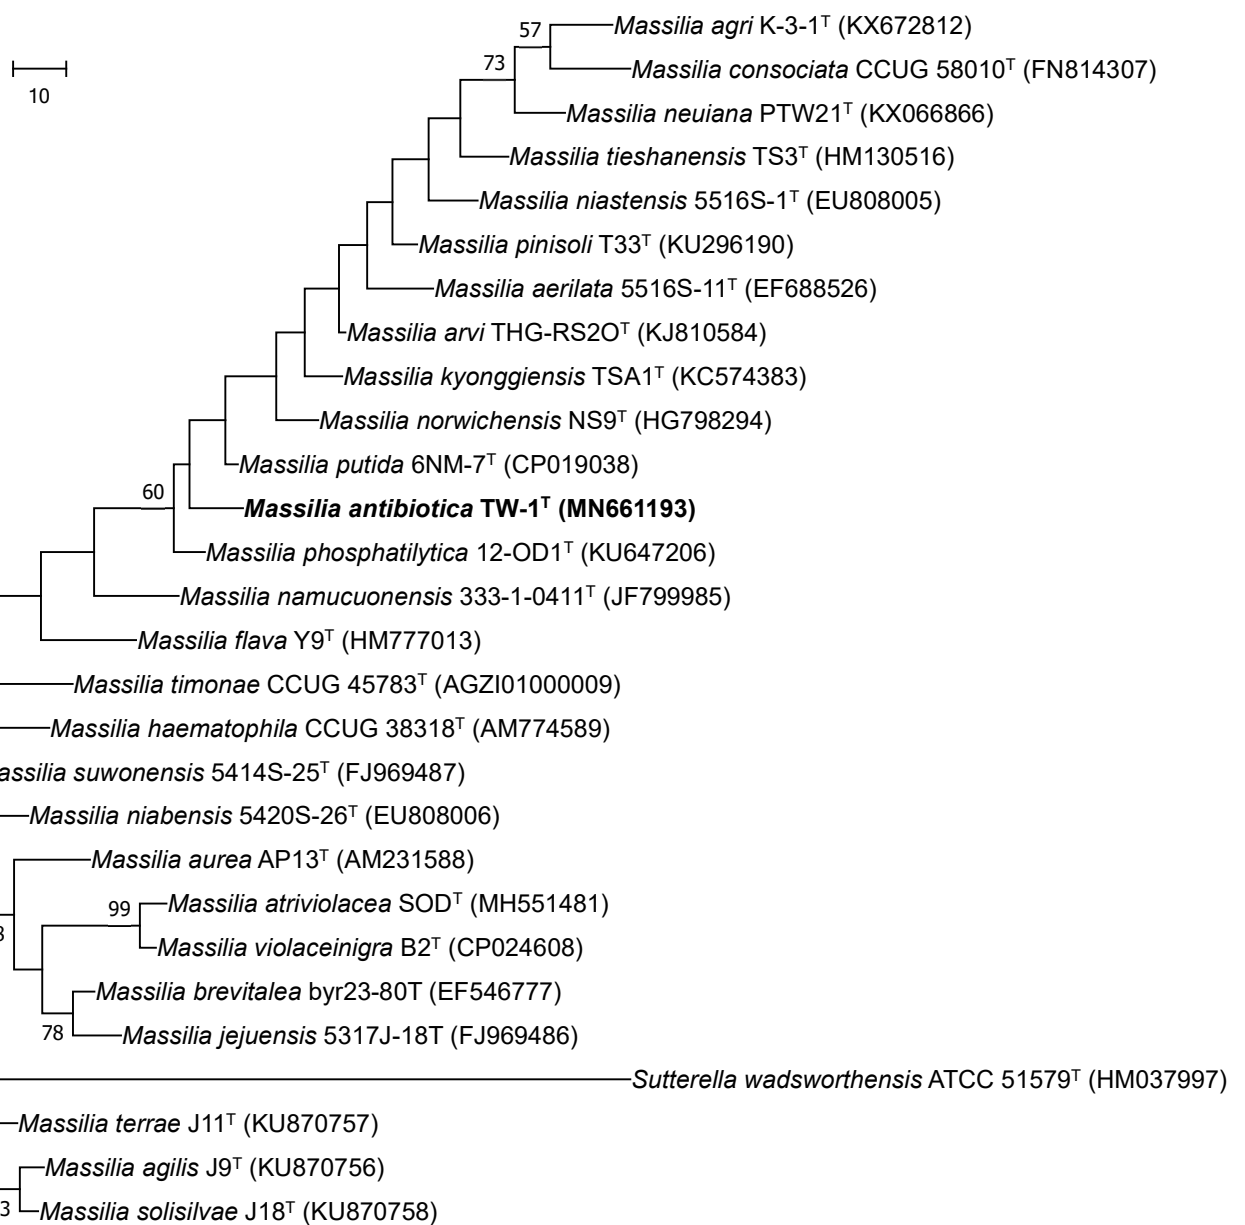

71

72 **Supplementary Figure S2.** Maximum-parsimony tree based on 16S rRNA gene sequences  
 73 showing the phylogenetic position of strain TW-1<sup>T</sup> among the closely related members of the  
 74 genus *Massilia*. The numbers at the nodes indicate the percentage of 1000 bootstrap replicates  
 75 yielding this topology; only values >50% are shown. *Sutterella wadsworthensis* ATCC 51579<sup>T</sup>  
 76 was used as an out-group. GenBank accession numbers are given in parentheses. Bar, 10  
 77 substitutions per nucleotide position.

78

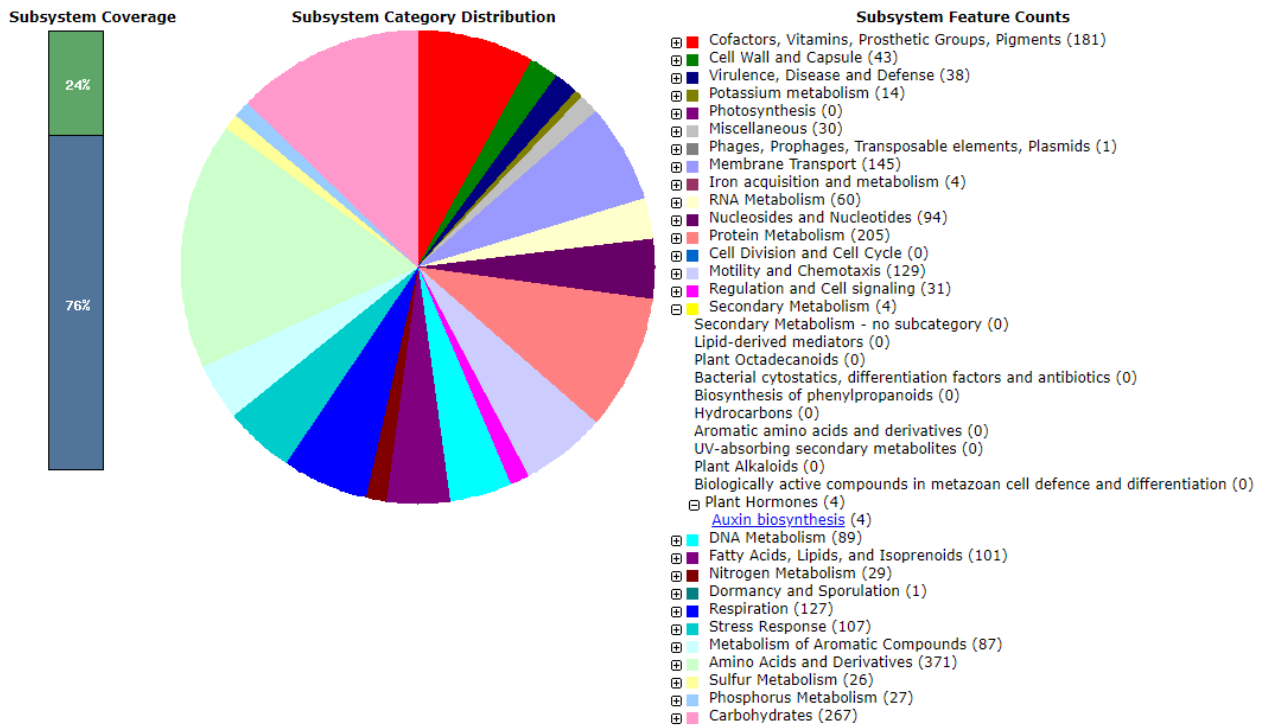

80

81

82

83 **Supplementary Figure S3.** Subsystem feature of strain TW-1<sup>T</sup> revealed by RAST (Rapid

84 Annotation using Subsystem Technology) server.

85

86

87 **Supplementary Figure S4.** Graphs of identified gene clusters obtained from anti-SMASH.  
 88 Each gene was compared with the NCBI database employing BlastP (protein-protein BLAST).  
 89 The colour code and the order correspond to the anti-SMASH prediction. Query sequence:  
 90 strain TW-1<sup>T</sup>. Maroon highlighted rows showed core biosynthetic genes and pink highlighted genes  
 91 showed additional biosynthetic genes.

92 **Cluster 1: Acyl\_amino\_acids**

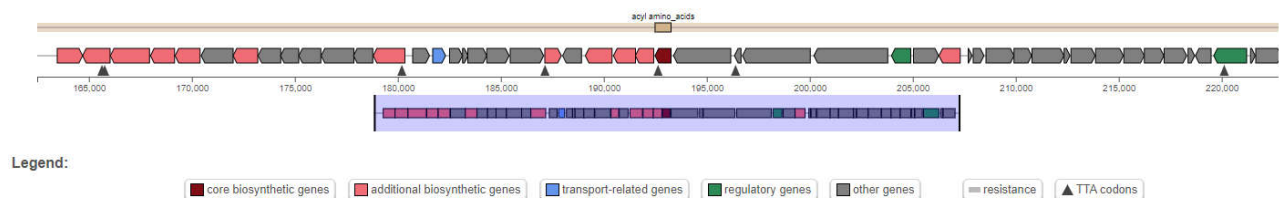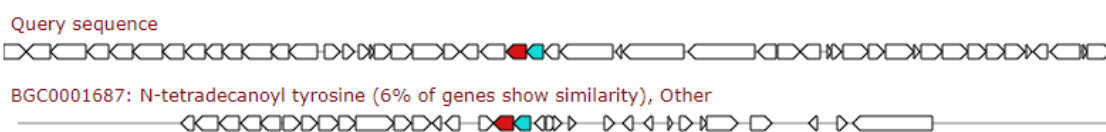

| Contig No./locus tag | Identified protein name                                             |
|----------------------|---------------------------------------------------------------------|
| Ctg3_145             | Pyridoxal-dependent decarboxylase, exosortase A system-associated   |
| Ctg3_146             | Putative O-glycosylation ligase, exosortase A system-associated     |
| Ctg3_147             | Amidotransferase 1, exosortase A system-associated                  |
| Ctg3_148             | TIGR03088 family PEP-CTERM/XrtA system glycosyltransferase          |
| Ctg3_149             | Glycosyltransferase, exosortase A system-associated                 |
| Ctg3_150             | Exosortase A                                                        |
| Ctg3_151             | TIGR03087 family PEP-CTERM/XrtA system glycosyltransferase          |
| Ctg3_152             | FemAB family PEP-CTERM system-associated protein                    |
| Ctg3_153             | DUF3473 domain-containing protein                                   |
| Ctg3_154             | AAA family ATPase                                                   |
| Ctg3_155             | TIGR03016 family PEP-CTERM system-associated outer membrane protein |
| Ctg3_156             | AAA family ATPase                                                   |
| Ctg3_157             | Chain length-determining protein                                    |
| Ctg3_158             | Trypsin-like peptidase domain-containing protein                    |
| Ctg3_159             | Polysaccharide biosynthesis/export family protein                   |
| Ctg3_160             | Hypothetical protein                                                |
| Ctg3_161             | HPr-rel-A system PqqD family peptide chaperone                      |
| Ctg3_162             | HprK-related kinase A                                               |
| Ctg3_163             | Nucleotidyltransferase family protein                               |
| Ctg3_164             | GMC family oxidoreductase N-terminal domain-containing protein      |
| Ctg3_165             | SDR family NAD(P)-dependent oxidoreductase                          |
| Ctg3_166             | PEP-CTERM sorting domain-containing protein                         |
| Ctg3_167             | Glycosyltransferase                                                 |
| Ctg3_168             | Molybdopterin biosynthesis protein MoeY                             |
| Ctg3_169             | ThiF family adenylyltransferase                                     |
| Ctg3_170             | N-acetyltransferase                                                 |

| <b>Contig No./locus tag</b> | <b>Identified protein name</b>                              |
|-----------------------------|-------------------------------------------------------------|
| Ctg3_171                    | PEP-CTERM system TPR-repeat protein PrsT                    |
| Ctg3_172                    | Hypothetical protein                                        |
| Ctg3_173                    | Cobalamin-dependent protein                                 |
| Ctg3_174                    | Indolepyruvate ferredoxin oxidoreductase family protein     |
| Ctg3_175                    | LysR family transcriptional regulator                       |
| Ctg3_176                    | DUF3391 domain-containing protein                           |
| Ctg3_177                    | Diguanylate cyclase                                         |
| Ctg3_178                    | Flp family type IVb pilin                                   |
| Ctg3_179                    | Prepilin peptidase                                          |
| Ctg3_180                    | ATP-binding protein                                         |
| Ctg3_181                    | Flp pilus assembly protein CpaB                             |
| Ctg3_182                    | Pilus assembly protein N-terminal domain-containing protein |
| Ctg3_183                    | Hypothetical protein                                        |
| Ctg3_184                    | AAA family ATPase                                           |
| Ctg3_185                    | Flp pilus assembly complex ATPase component TadA            |
| Ctg3_186                    | Type II secretion system F family protein                   |
| Ctg3_187                    | Type II secretion system F family protein                   |
| Ctg3_188                    | LytR C-terminal domain-containing protein                   |
| Ctg3_189                    | BON domain-containing protein                               |
| Ctg3_190                    | DUF2807 domain-containing protein                           |
| Ctg3_191                    | Sigma 54-interacting transcriptional regulator              |
| Ctg3_192                    | Hypothetical protein                                        |
| Ctg3_193                    | RtcB family protein                                         |

95

96

97

98

99

100

101

102

103

104 **Cluster 2: Thiopeptide**

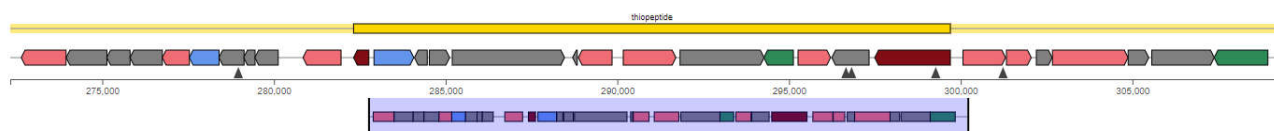

Legend:

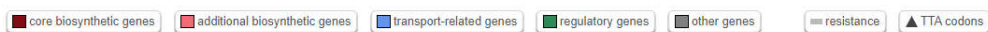

Query sequence

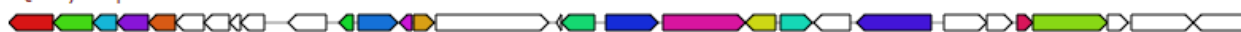

NZ\_CP019038 (4695767-4724913): *Massilia putida* strain 6NM-7 chromosome, compl... (33% of genes show similarity), thic

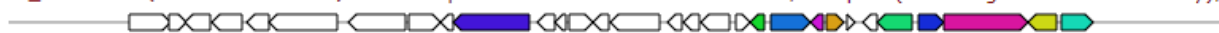

105

| Contig No./locus tag | Identified protein name                                             |
|----------------------|---------------------------------------------------------------------|
| Ctg7_237             | Precorrin-6γ C5,15-methyltransferase (decarboxylating) subunit CbiE |
| Ctg7_238             | Cobalt-precorrin-5B (C(1))-methyltransferase                        |
| Ctg7_239             | Precorrin-8X methylmutase                                           |
| Ctg7_240             | Sirohydrochlorin chelatase                                          |
| Ctg7_241             | Precorrin-4 C(11)-methyltransferase                                 |
| Ctg7_242             | ATP-binding cassette domain-containing protein                      |
| Ctg7_243             | Cobalt ECF transporter T component CbiQ                             |
| Ctg7_244             | Energy-coupling factor ABC transporter substrate-binding protein    |
| Ctg7_245             | Energy-coupling factor ABC transporter permease                     |
| Ctg7_246             | N-ethylmaleimide reductase                                          |
| <b>Ctg7_247</b>      | <b>Nuclear transport factor 2 family protein</b>                    |
| Ctg7_248             | ABC transporter substrate-binding protein                           |
| Ctg7_249             | Hypothetical protein                                                |
| Ctg7_250             | YgjV family protein                                                 |
| Ctg7_251             | DEAD/DEAH box helicase                                              |
| Ctg7_252             | Organic hydroperoxide resistance protein                            |
| Ctg7_253             | Alpha/beta fold hydrolase                                           |
| Ctg7_254             | Carboxylesterase family protein                                     |
| Ctg7_255             | DUF4968 domain-containing protein                                   |
| Ctg7_256             | Helix-turn-helix domain-containing protein                          |
| Ctg7_257             | Alpha/beta fold hydrolase                                           |
| Ctg7_258             | Hypothetical protein                                                |
| <b>Ctg7_259</b>      | <b>OsmC domain/YcaO domain-containing protein</b>                   |
| Ctg7_260             | FAD-dependent monooxygenase                                         |
| Ctg7_261             | Thioredoxin fold domain-containing protein                          |
| Ctg7_262             | 2Fe-2S iron-sulfur cluster binding domain-containing protein        |
| Ctg7_263             | Molybdopterin-dependent oxidoreductase                              |
| Ctg7_264             | NTP transferase domain-containing protein                           |
| Ctg7_265             | PDZ domain-containing protein                                       |
| Ctg7_266             | Response regulator                                                  |

106



107 **Cluster 3: Bacteriocin**

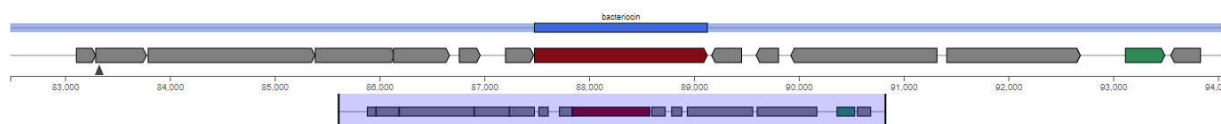

Legend:

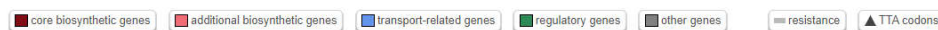

Query sequence

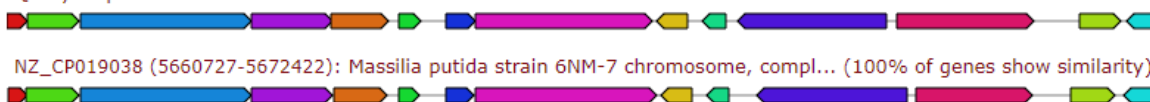

108

| Contig No./locus tag | Identified protein name                                   |
|----------------------|-----------------------------------------------------------|
| Ctg8_74              | Hypothetical protein                                      |
| Ctg8_75              | Hypothetical protein                                      |
| Ctg8_76              | AAA family ATPase                                         |
| Ctg8_77              | General secretion pathway protein GspB                    |
| Ctg8_78              | Molybdopterin-guanine dinucleotide biosynthesis protein B |
| Ctg8_79              | Putative motility protein                                 |
| Ctg8_80              | DUF2282 domain-containing protein                         |
| <b>Ctg8_81</b>       | <b>DUF692 family protein</b>                              |
| Ctg8_82              | Hypothetical protein                                      |
| Ctg8_83              | RNA-binding S4 domain-containing protein                  |
| Ctg8_84              | Class II fumarate hydratase                               |
| Ctg8_85              | Hypothetical protein                                      |
| Ctg8_86              | Winged helix-turn-helix transcriptional regulator         |
| Ctg8_87              | Flagellar protein FliT                                    |

109

110

111

112

113

114

115

116

117

118

119

120 **Cluster 4: Terpene**

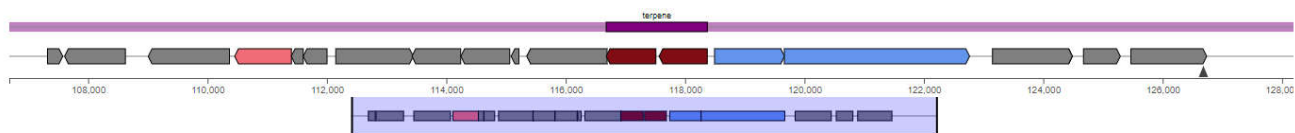

Legend:

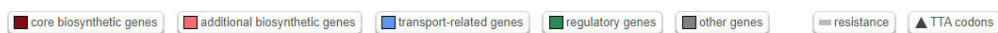

Query sequence

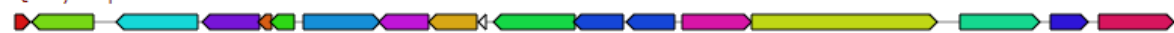

NZ\_CP019038 (205415-225146): *Massilia putida* strain 6NM-7 chromosome, complet... (100% of genes show similarity), ter

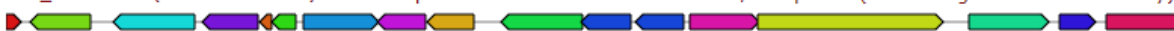

121

| Contig No./locus tag | Identified protein name                                  |
|----------------------|----------------------------------------------------------|
| Ctg13_89             | Molybdopterin converting factor subunit 1                |
| Ctg13_90             | TRAP transporter substrate-binding protein DctP          |
| Ctg13_91             | M28 family peptidase                                     |
| Ctg13_92             | Alpha/beta fold hydrolase                                |
| Ctg13_93             | Helix-turn-helix domain-containing protein               |
| Ctg13_94             | Hypothetical protein                                     |
| Ctg13_95             | TIGR03862 family flavoprotein                            |
| Ctg13_96             | DUF2807 domain-containing protein                        |
| Ctg13_97             | DUF1700 domain-containing protein                        |
| Ctg13_98             | Hypothetical protein                                     |
| Ctg13_99             | FAD-dependent oxidoreductase                             |
| Ctg13_100            | Presqualene diphosphate synthase HpnD                    |
| Ctg13_101            | Squalene synthase HpnC                                   |
| Ctg13_102            | Efflux RND transporter periplasmic adaptor subunit       |
| Ctg13_103            | Efflux RND transporter permease subunit                  |
| Ctg13_104            | Trigger factor                                           |
| Ctg13_105            | ATP-dependent Clp endopeptidase proteolytic subunit ClpP |
| Ctg13_106            | ATP-dependent Clp protease ATP-binding subunit ClpX      |

122

123

124

125

126

127

128

129

130

131 **Cluster 5: Siderophore**

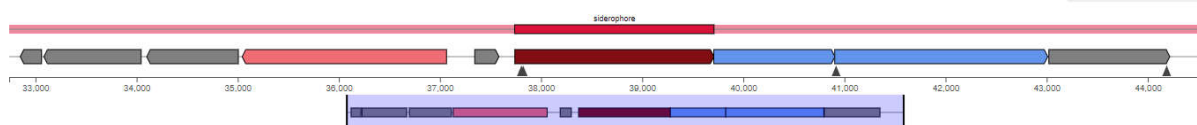

Legend:

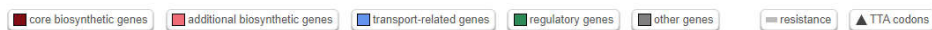

Query sequence

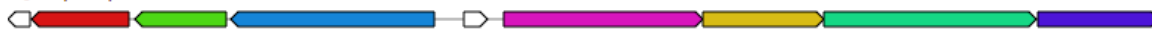

NZ\_CP019038 (2176678-2188529): *Massilia putida* strain 6NM-7 chromosome, compl... (75% of genes show similarity), sid

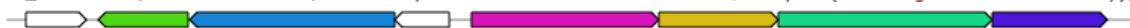

132

| Contig No./locus tag | Identified protein name                           |
|----------------------|---------------------------------------------------|
| Ctg30_29             | No significant similarity                         |
| Ctg30_30             | Hypothetical protein                              |
| Ctg30_31             | tRNA glutamyl-Q(34) synthetase GluQRS             |
| Ctg30_32             | EAL domain-containing protein                     |
| Ctg30_33             | No significant similarity                         |
| Ctg30_34             | IucA/IucC family siderophore biosynthesis protein |
| Ctg30_35             | MFS transporter                                   |
| Ctg30_36             | TonB-dependent siderophore receptor               |
| Ctg30_37             | PepSY domain-containing protein                   |

133

134

135

136

137

138

139

140

141

142

143

144

145

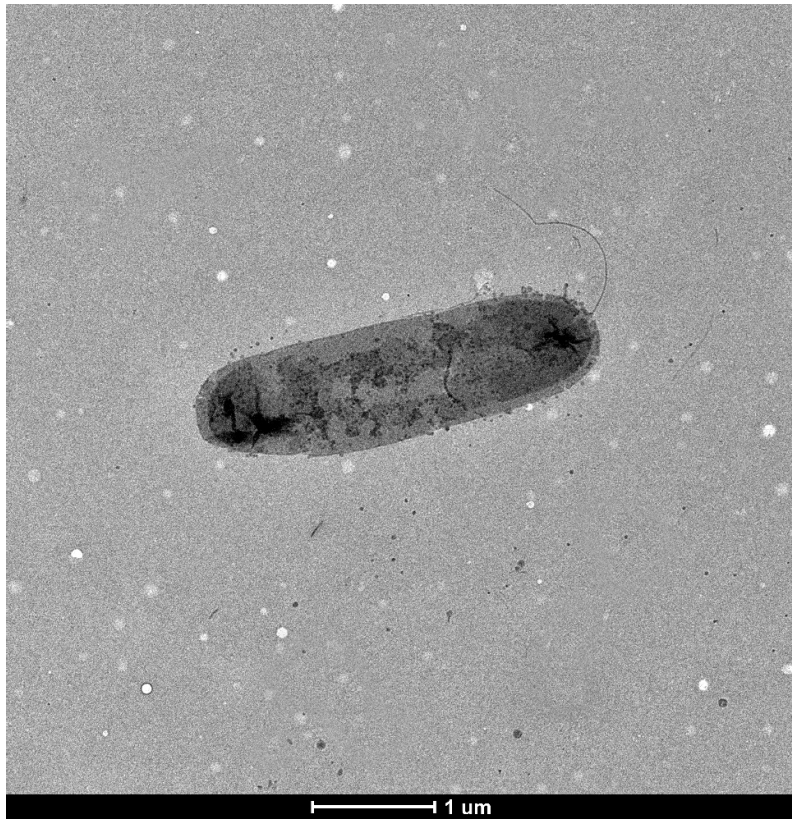

147

148 **Supplementary Figure S5.** Transmission electron photomicrograph of strain TW-1<sup>T</sup> grown on  
149 R2A agar at 15 °C for 5 days. Bar, 1 μm.

150

151

152

153

154

155

156

157

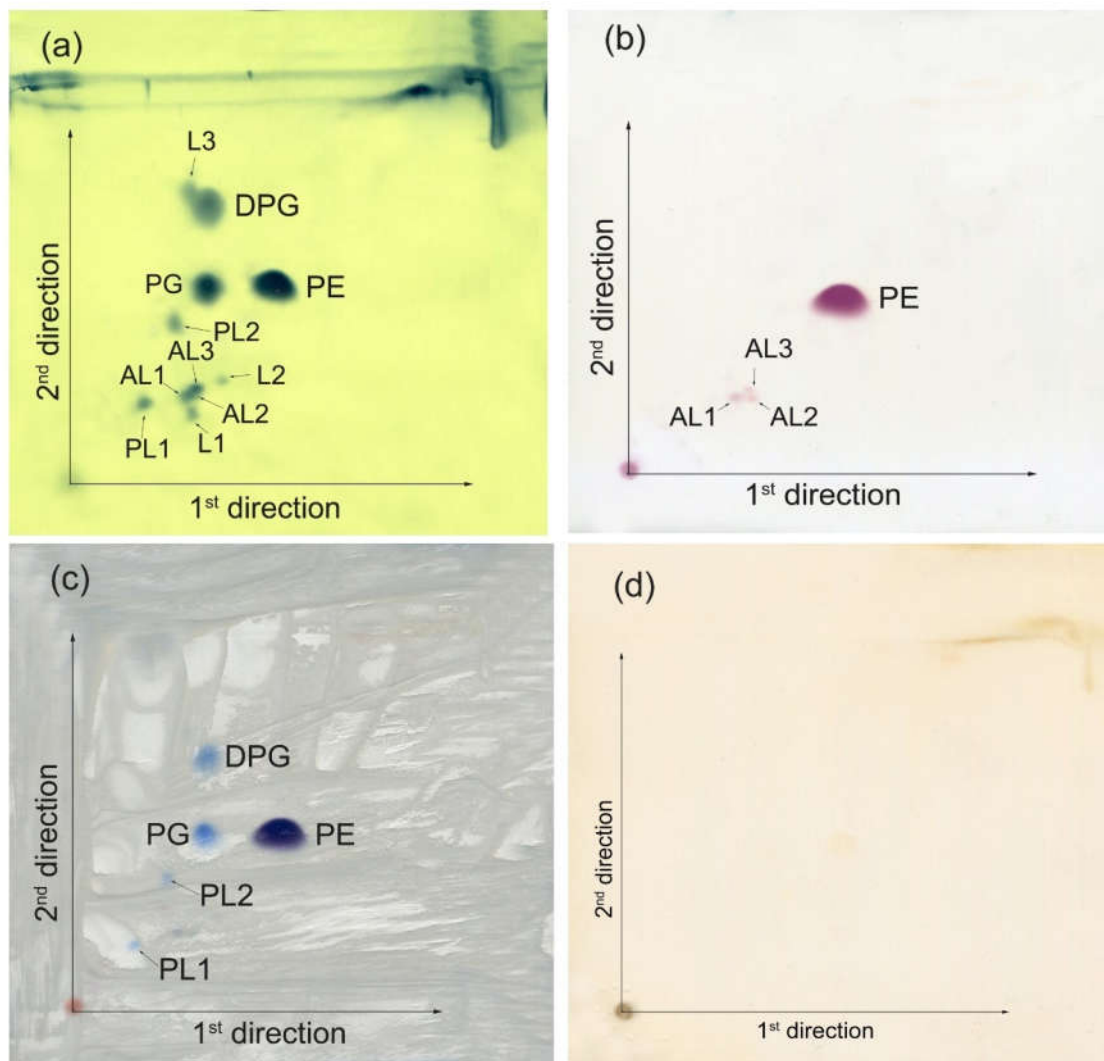

159

160 **Supplementary Figure S6.** Thin-layer chromatograms of the polar lipids from strain TW-1<sup>T</sup>.  
 161 The components were seen by staining with 5% molybdophosphoric acid in ethanol and heating  
 162 them at 180 °C for 15 min (a); ninhydrin at 110 °C for 15 min (b); molybdenum at room  
 163 temperature (c); and  $\alpha$ -naphthol-sulfuric acid at 110 °C for 15 min (d). Abbreviations: PE,  
 164 phosphatidylethanolamine; DPG, diphosphatidylglycerol; PG, phosphatidylglycerol; AL1–  
 165 AL3, unidentified aminolipids; PL1–PL2, unidentified phospholipids; L1–L3, unidentified  
 166 polar lipids.

167

168

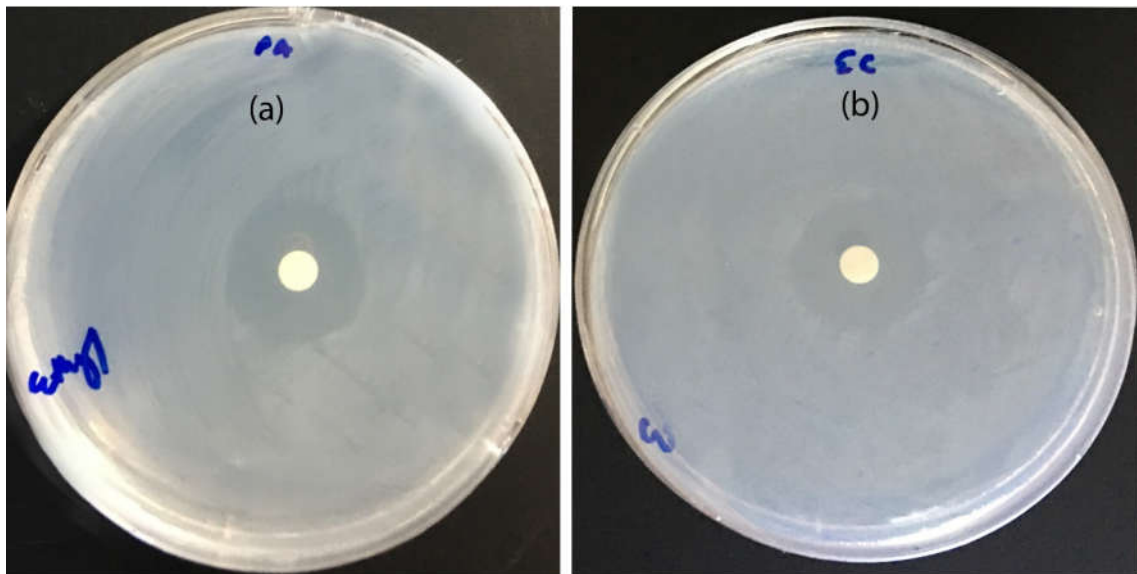

170

171

172 **Supplementary Figure S7.** Zone of inhibition shown by ethyl acetate extract of culture  
173 supernatant from strain TW-1<sup>T</sup> against *Pseudomonas aeruginosa* KACC 10185 (a) and  
174 *Escherichia coli* KEMB 212-234 (b). For negative control 15  $\mu$ L of methanol in 6 mm paper  
175 disc was used.
